# Supplementary material for: Associations Between Dental Care Approachability and Dental Attendance Among Women Pregnant With an Indigenous Child: A Cross-Sectional Study
Source: Research Square preprint supplement (doi:10.21203/rs.3.rs-107088/v1), 2020-11-30

# **Associations between dental care approachability and dental attendance among women pregnant with an Indigenous child: A cross-sectional study**

Yuan Gao<sup>1</sup>, Xiangqun Ju<sup>2</sup>, Lisa Jamieson<sup>2\*</sup>

## **Affiliation:**

<sup>1</sup> School of public health, The University of Adelaide, South Australia 5000, Australia

Email address: [yuan.gao02@student.adelaide.edu.au](mailto:yuan.gao02@student.adelaide.edu.au)

Ph: +61 0433992751

<sup>2</sup> Australian Research Centre for Population Oral Health, Adelaide Dental School, University of Adelaide, Adelaide, South Australia, Australia

Email address: [xiangqun.ju@adelaide.edu.au](mailto:xiangqun.ju@adelaide.edu.au)

## **\*Correspondence:**

Lisa Jamieson

Australian Research Centre for Population Oral Health  
Adelaide Health & Medical Sciences Building

The University of Adelaide, SA 5005

Australia Email address [lisa.jamieson@adelaide.edu.au](mailto:lisa.jamieson@adelaide.edu.au)

Ph: +61 8 8313 4611

**Table S1 Questionnaire of factors impacting on dental service approachability**

|    |                                                                                                                                |
|----|--------------------------------------------------------------------------------------------------------------------------------|
|    | Questions/Answerers                                                                                                            |
|    | <i>Perception of need and desire of care</i>                                                                                   |
| Q1 | Do you think you need to see a dentist?                                                                                        |
|    | 1. Yes<br>2. No                                                                                                                |
|    |                                                                                                                                |
|    | <i>Service-related health literacy</i><br><i>(Oral health systems navigation: What to do when you want to see the dentist)</i> |
| Q2 | If you needed to visit to the dentist tomorrow, would you know what to do?                                                     |
|    | 1. Yes<br>2. No                                                                                                                |
|    |                                                                                                                                |
| Q3 | Do you think there would be a dentist able to see you tomorrow?                                                                |
|    | 1. Yes<br>2. No                                                                                                                |
|    |                                                                                                                                |
|    | <i>Dental care consequence</i>                                                                                                 |
| Q4 | Do you think you have gum disease/bleeding gums?                                                                               |
|    | 1. Yes<br>2. No                                                                                                                |
|    |                                                                                                                                |
|    | <i>Dental care utilisation</i>                                                                                                 |
| Q5 | When did you last see a dentist?                                                                                               |
|    | 1. Less than one year ago<br>2. More than one year ago                                                                         |
|    |                                                                                                                                |
|    | <i>Oral health beliefs: How important do you rate the following in relation to teeth?</i>                                      |
| Q6 | Visiting dentist                                                                                                               |
|    | 1. Extremely important<br>2. Fairly important<br>3. Doesn't matter much<br>4. Not very important<br>5. Not at all important    |
|    |                                                                                                                                |
|    | <i>Trust and expectation to the service</i>                                                                                    |
| Q7 | I believe going to dentist would help my teeth.                                                                                |
|    | 1. Strongly agree<br>2. Somewhat agree<br>3. Neither agree nor disagree<br>4. Somewhat disagree<br>5. Strongly disagree        |

**Figure S1 Variables corresponding to service-oriented model of accessing dental care**

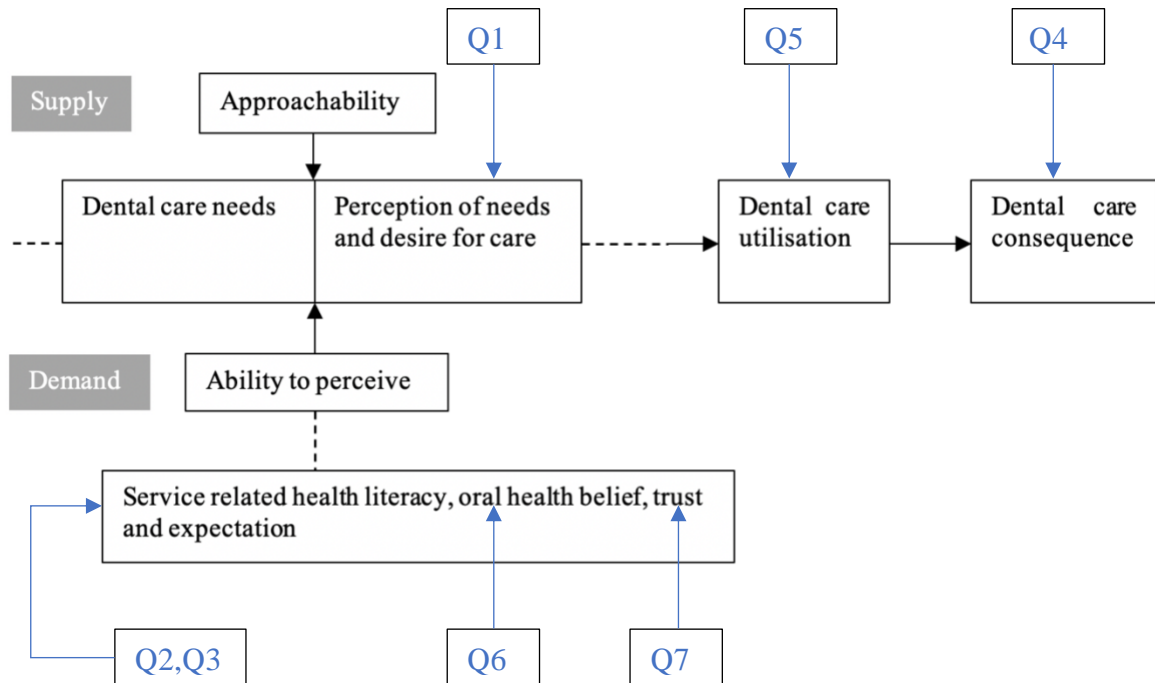

Supplement: Supplementary file 1 [file df56424b61c87d65427d7c1e.pdf]
